# Supplementary material
Source: Springer Nature journal article supplement (https://www.springermedizin.de/resource/supplementary/13054_2012_556_MOESM5_ESM.pdf/9708802)

### 3 hours

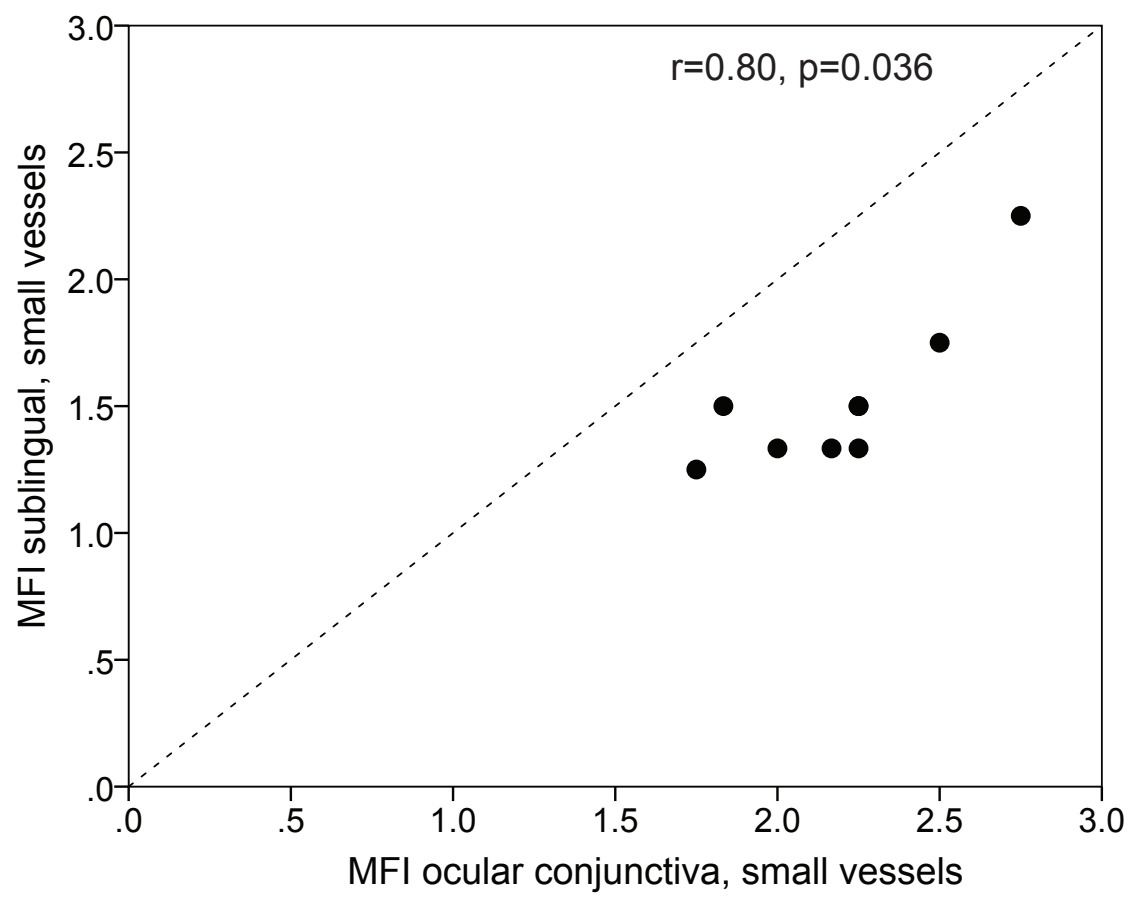

### 5 hours

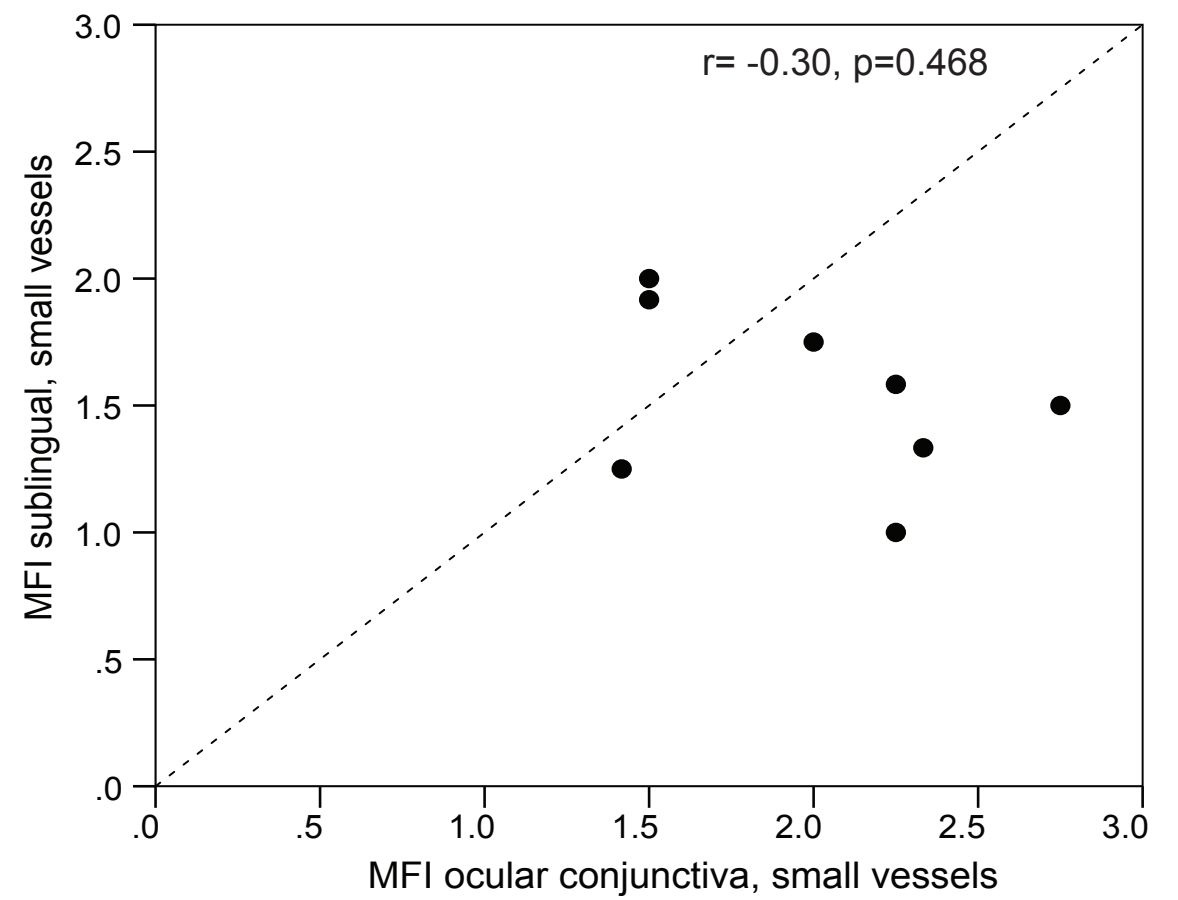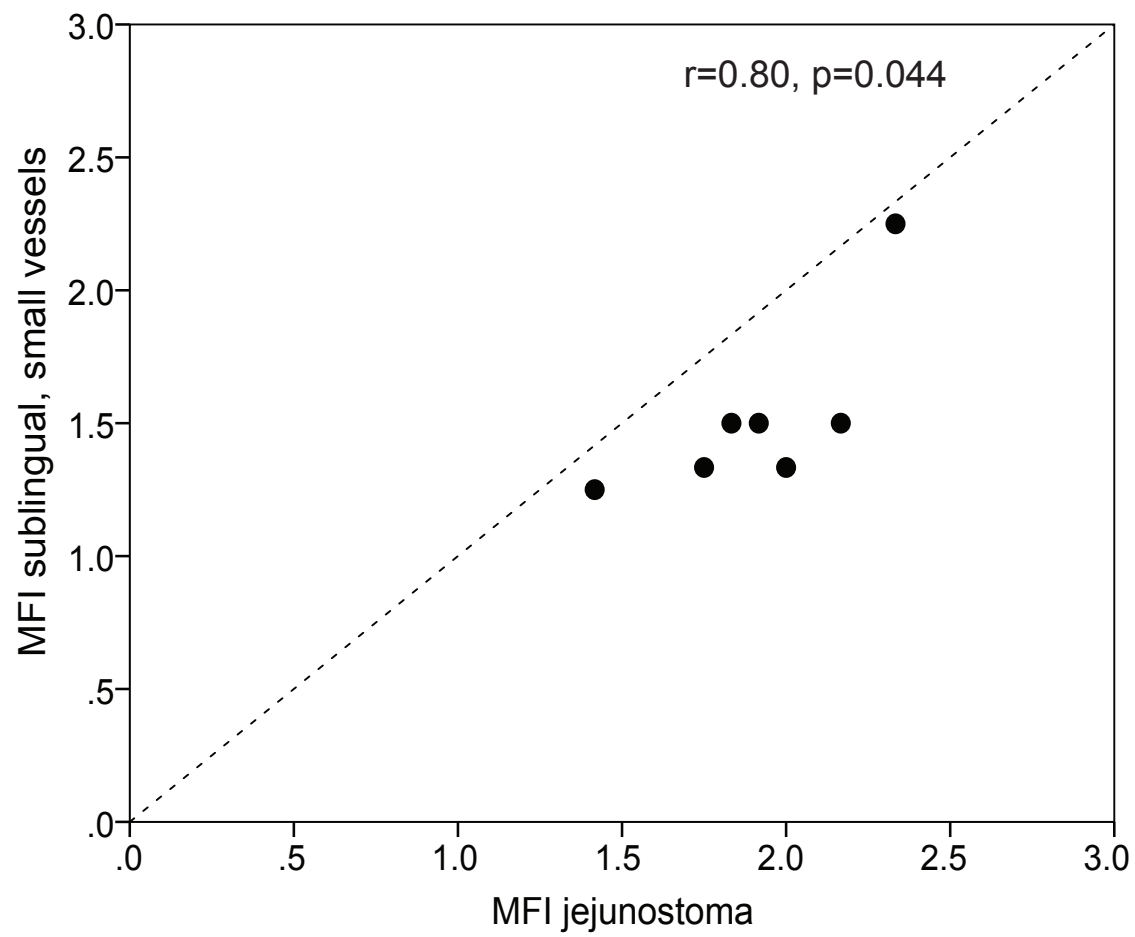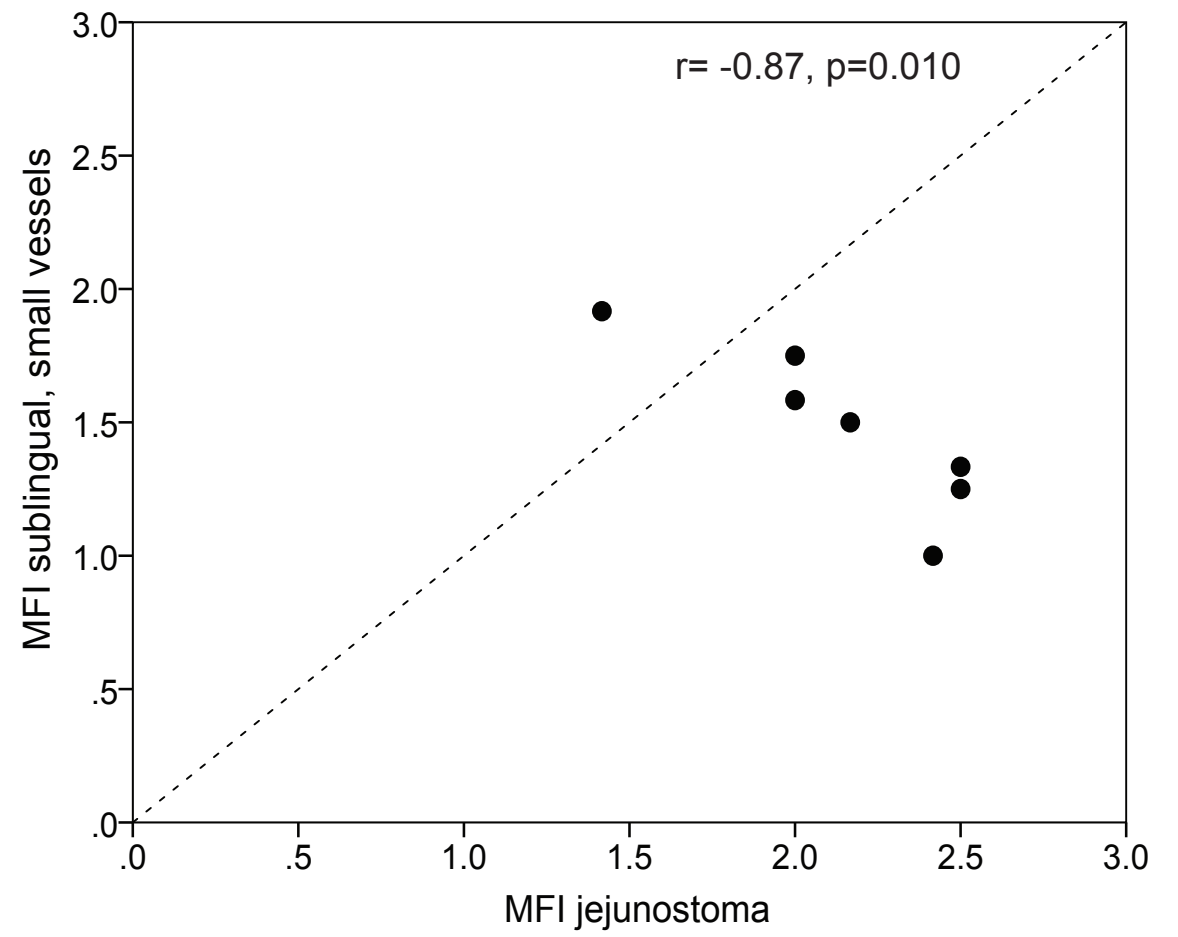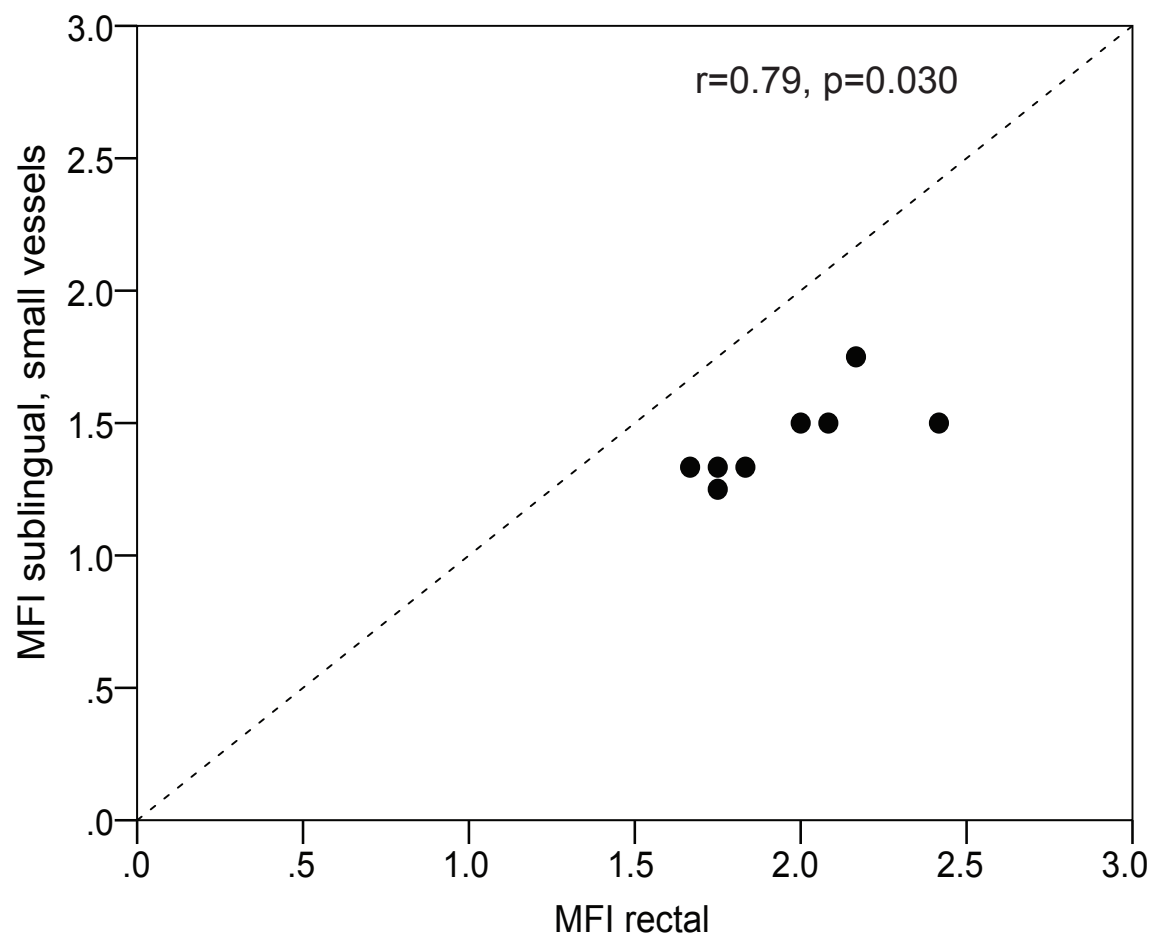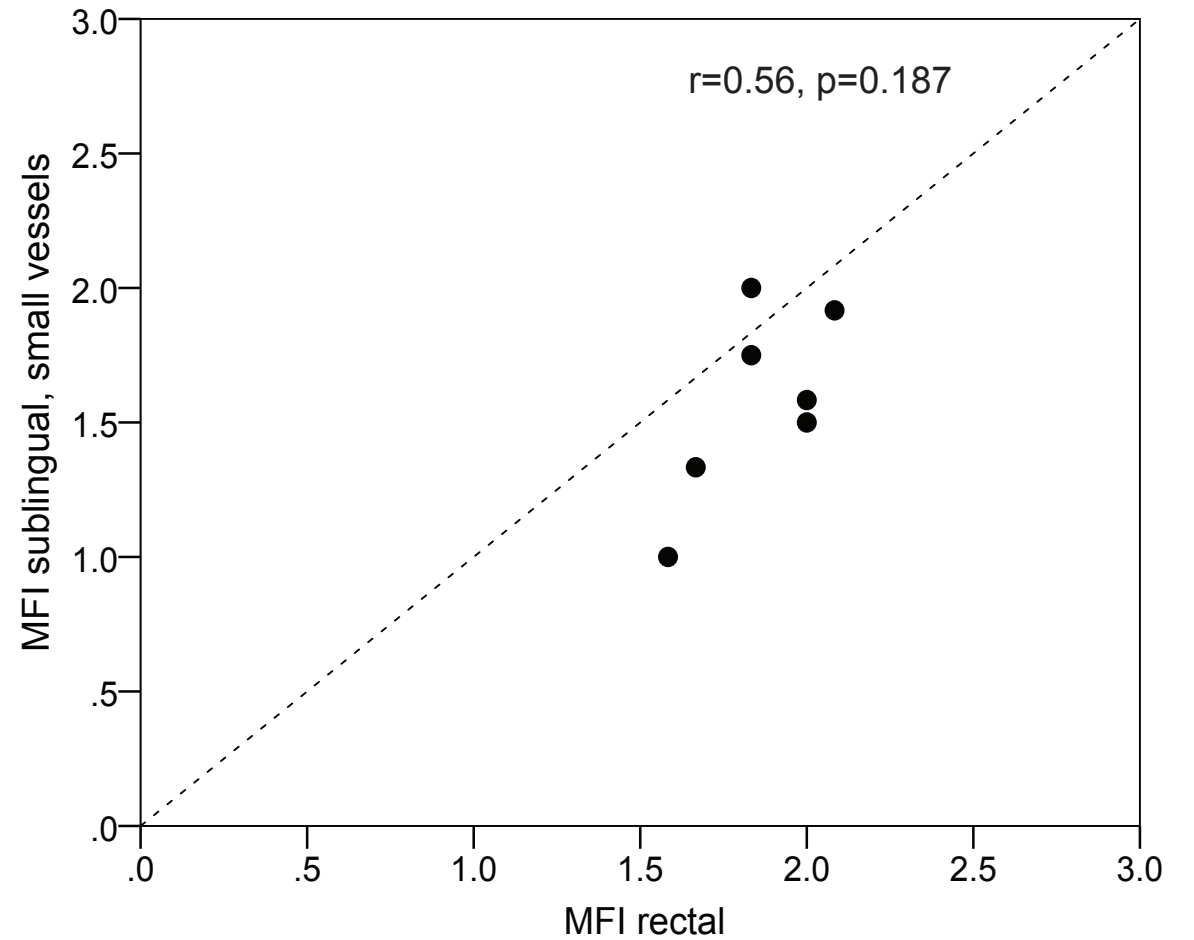

Supplement: MOESM5 [file 9708802]
